# Supplementary material
Source: PubMed Central journal article supplement (PMC8085133)

PageRuler™ Plus Ladder

BW25113

BW25113, ftsW::ftsW-rfp

BW25113, ftsW::ftsW-rfp 1:10 dilution

BW25113 1:10 dilution

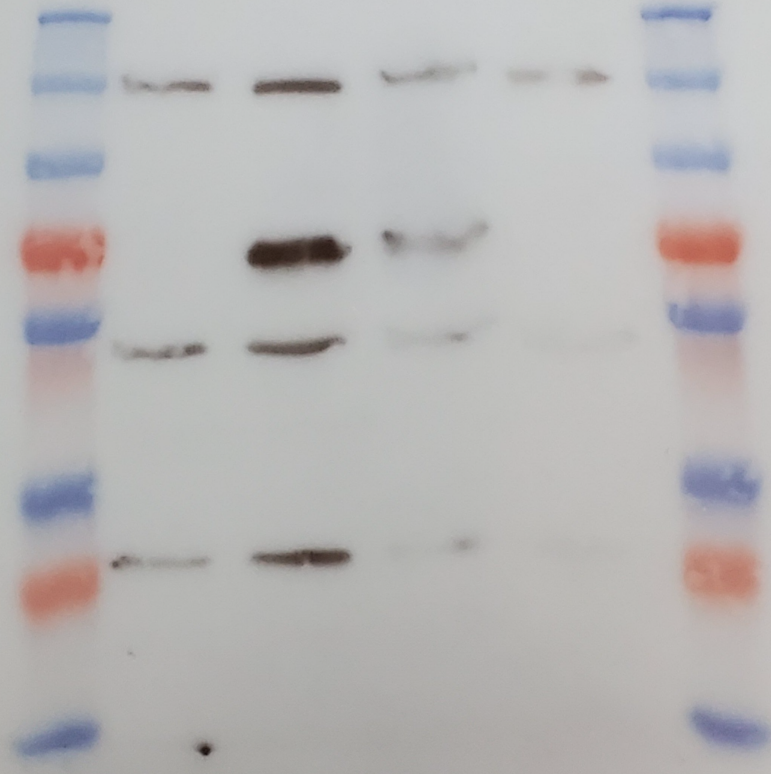

Supplement: NIHMS1655208-supplement-1655208_SourceDataSuppFigure1.pdf [file NIHMS1655208-supplement-1655208_SourceDataSuppFigure1.pdf]

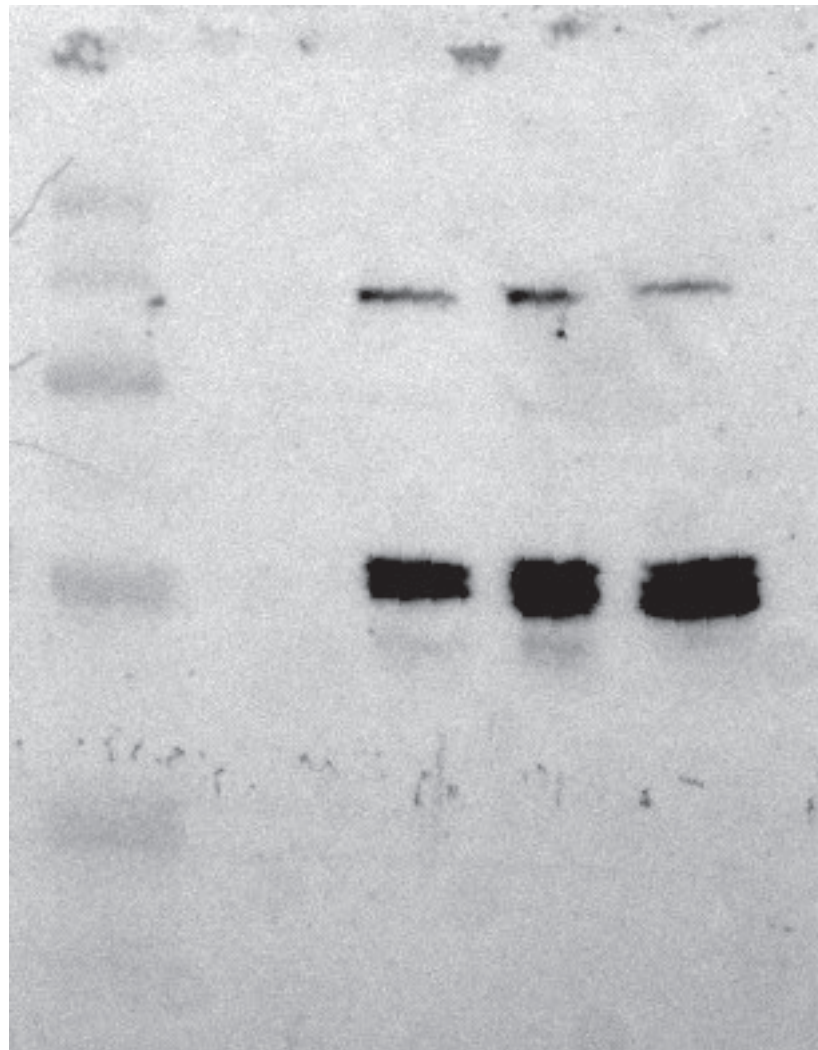

Supplement: NIHMS1655208-supplement-1655208_SourceDataSuppFigure6.pdf [file NIHMS1655208-supplement-1655208_SourceDataSuppFigure6.pdf]
